# Supplementary material for: Morphology memory but reconstructing crystal structure: porous hexagonal GeO2nanorods for rechargeable lithium-ion batteries
Source: Royal Society of Chemistry journal article supplement (doi:10.1039/c7nr00599g), 2017-01-01
Supplement: c7nr00599g1.pdf [file c7nr00599g1.pdf]

## Morphology Memory but Reconstructing Crystal Structure: Porous Hexagonal GeO<sub>2</sub> Nanorods for Rechargeable Lithium-ion Batteries

Wei Wei, Fangfang Jia, Peng Qu\*, Zhongning Huang, Hua Wang\* and Lin Guo\*

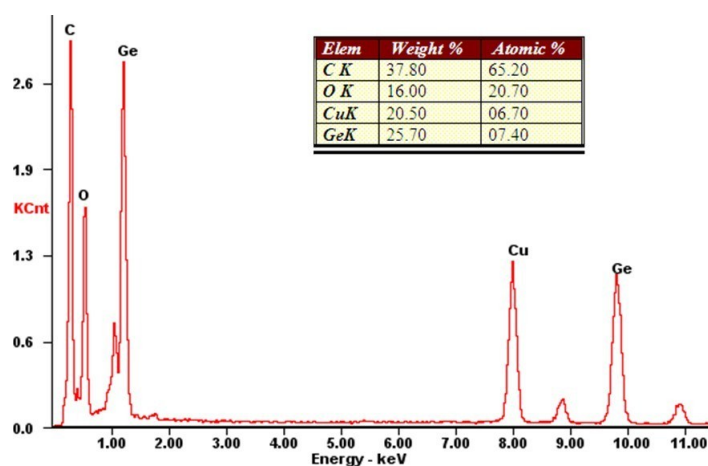

Figure S1. EDS elemental analysis of GeO<sub>2</sub> nanorods, C and Cu elements are arose from the carbon film of the TEM micro grid. No Ca element is detected, confirming that Ca is completely removed during the HNO<sub>3</sub> etching process.

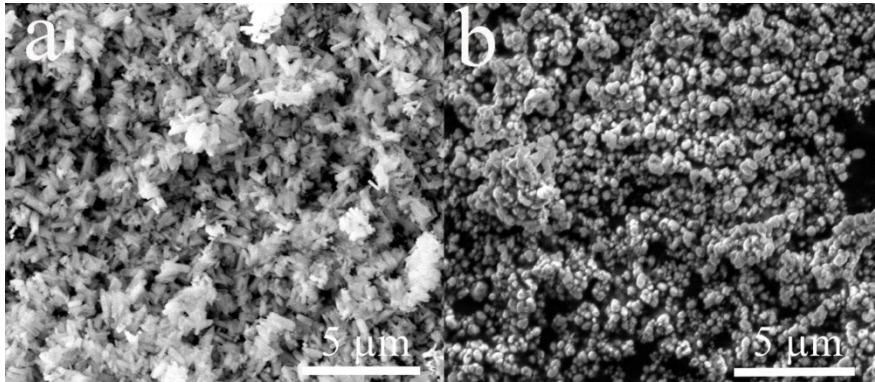

Figure S2. SEM image of  $\text{GeO}_2$  products obtained after immersed  $\text{Ca}_2\text{Ge}_7\text{O}_{16}$  nanorods in (a) 10 M  $\text{HNO}_3$  and (b) 7.5 M  $\text{HNO}_3$  for 1h.

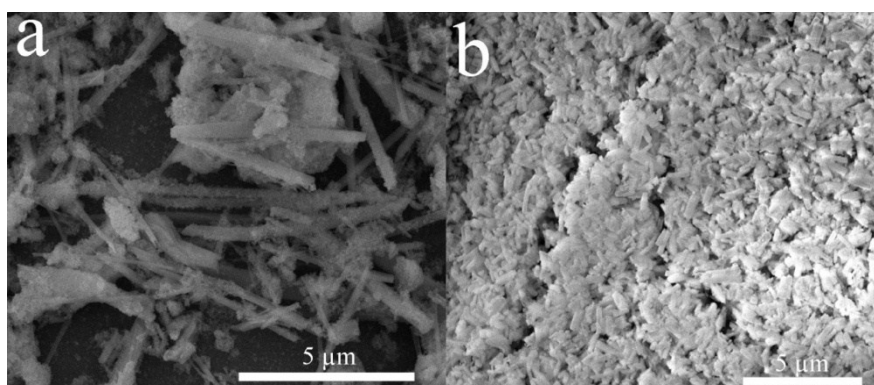

Figure S3. SEM image of (a)  $\text{GeO}_2$  and (b)  $\text{Ca}_2\text{Ge}_7\text{O}_{16}$  electrodes after 50 cycles.
